# Supplementary material
Source: PubMed Central journal article supplement (PMC8819989)
Supplement: ASN.2021050616SupplementaryData.pdf [file ASN.2021050616SupplementaryData.pdf]

Xanthine oxidoreductase inhibitors suppress the onset of exercise-induced  
AKI in high HPRT activity *Urat1-Uox* double knockout mice

**Supplemental Information**

Takuji Hosoya <sup>1,3</sup>, Shunya Uchida <sup>2</sup>, Shigeru Shibata <sup>2</sup> Naoko H. Tomioka <sup>1</sup>,

Koji Matsumoto <sup>3</sup> and Makoto Hosoyamada <sup>1</sup>

<sup>1</sup>*Department of Human Physiology & Pathology, Faculty of Pharma-Science, Teikyo*

*University, Tokyo, Japan, <sup>2</sup>Division of Nephrology, Department of Internal Medicine,*

*Teikyo University School of Medicine, Tokyo, Japan, and <sup>3</sup>Biological Research*

*Department, Research Institute, FUJI YAKUHI CO., LTD., Saitama, Japan.*

## Supplemental Methods

- **In vivo experimental protocols.**

## Supplemental Figure Legends

- **Supplemental Figure 1.**

Growth curves of male and female high hypoxanthine phosphoribosyltransferase (HPRT) activity *Uox*-KO and *Urat1-Uox* double knockout (DKO) mice.

- **Supplemental Figure 2.**

UA kinetic profiling of male low HPRT activity *Urat1-Uox* DKO mice.

- **Supplemental Figure 3.**

Exercise-induced acute kidney injury (EIAKI) of female high HPRT activity *Urat1-Uox* DKO mice.

- **Supplemental Figure 4.**

Correlation of renal functional makers with UA kinetic parameters in high HPRT activity *Uox*-KO and *Urat1-Uox* DKO mice before (pre) and after (post) the forced swimming test.

- **Supplemental Figure 5.**

Correlation of IL-1 $\beta$  and Na<sup>+</sup>-K<sup>+</sup>-ATPase (NKA) protein with UA kinetic and renal injury parameters in the post-exercise group.

## **Supplemental Methods**

### ***In vivo* experimental protocols.**

Study 1: Male low hypoxanthine phosphoribosyltransferase (HPRT) activity *Uox*-KO mice (n=8) and *Urat1-Uox* double knockout (DKO) mice (n=5) were fed standard powder chow (CRF-1). Blood or pooled and spot urine samples were collected.

Study 2: Female high HPRT activity *Uox*-KO (n=6) and *Urat1-Uox* DKO mice (n=6) were used in the forced swimming test. The blood and pooled urine samples were collected before (pre) and after (post) the forced swimming test, respectively.

## **Supplemental Figure Legends**

### **Supplemental Figure 1**

**Growth curves of male and female HPRT activity *Uox*-KO and *Urat1-Uox* DKO mice.** The growth curves of male and female mice from 6 to 20 weeks were similar between the *Uox*-KO and *Urat1-Uox* DKO group. Data represent means  $\pm$  SEM of 3 to 8 mice per group.

### **Supplemental Figure 2**

#### **UA kinetic profiling of male low HPRT activity *Urat1-Uox* DKO mice.**

(A) Plasma UA (mg/dL), (B) urinary UA/Cr ratio, (C) fractional excretion of UA (FE<sub>UA</sub>; %) and (D) plasma Cr (mg/dL) in male low HPRT activity *Uox*-KO (n=8), and *Urat1-Uox* DKO mice (n=5). (E) HPRT activity (nmol/min/mg erythrocyte) in male low HPRT activity *Uox*-KO, and *Urat1-Uox* DKO mice (n=5 per group). Data represent means  $\pm$  SEM. NS., not significant ( $p > 0.05$ ). UA, urate; Cr, creatinine.

### Supplemental Figure 3

**Exercise-induced acute kidney injury (EIAKI) of female high HPRT activity *Urat1-Uox* DKO mice.** (A) Plasma Cr (mg/dL), (B) Cr clearance ( $CL_{Cr}$ ; mL/min/kg), (C) plasma UA (mg/dL), (D) urinary UA/Cr ratio, (E)  $FE_{UA}$  (%) and (F) UA clearance ( $CL_{UA}$ ; mL/min/kg) in female high HPRT activity *Uox*-KO (n=6) and *Urat1-Uox* DKO mice (n=6) pre- and post-exercise. A-F data represent means  $\pm$  SEM; data were analyzed using 2-way ANOVA with Tukey's *post hoc* test in A-F. Significantly different from pre-exercise group (\* $p < 0.05$ , \*\* $p < 0.01$ , \*\*\* $p < 0.001$ ), and change in *Uox*-KO group ( $^{\#}p < 0.05$ ,  $^{\#\#}p < 0.01$ ,  $^{\#\#\#}p < 0.001$ ). NS, not significant ( $p > 0.05$ ). UA, urate; Cr, creatinine; WT, wild-type.

### Supplemental Figure 4

**Correlation of renal functional makers with UA kinetic parameters in high HPRT activity *Uox*-KO and *Urat1-Uox* DKO mice before (pre) and after (post) the forced swimming test.** The correlation of plasma Cr with (A) plasma UA, (B) urinary UA/Cr ratio, (C)  $FE_{UA}$  and (D)  $CL_{UA}$ , the correlation of BUN with (E) plasma UA, (F) urinary UA/Cr ratio, (G)  $FE_{UA}$  and (H)  $CL_{UA}$ , the correlation of Cr clearance ( $CL_{Cr}$ ) with (I) plasma UA, (J) urinary UA/Cr ratio, (K)  $FE_{UA}$  and (L)  $CL_{UA}$  in *Uox*-KO (n=8) and *Urat1-Uox* DKO mice (n=9) before (pre) and after (post) the forced swimming test. Data were analyzed using scatter plots. The coefficient of determination and  $p$  value are shown in each panel.

### Supplemental Figure 5

**Correlation of IL-1 $\beta$  and Na<sup>+</sup>-K<sup>+</sup>-ATPase (NKA) protein with UA kinetic and renal**

**injury parameters in the post-exercise group.** The correlation of IL-1 $\beta$  protein with (A) plasma UA, (B) urinary UA/Cr ratio, (C) FE<sub>UA</sub>, (D) plasma Cr, (E) BUN, and (F) CL<sub>Cr</sub> in WT (n=8), high HPRT activity *Uox*-KO (n=8) and *Urat1-Uox* DKO mice (n=9) after (post) the forced swimming test. The correlation of Na<sup>+</sup>-K<sup>+</sup>-ATPase (NKA) protein with (G) plasma UA, (H) urinary UA/Cr ratio, (I) FE<sub>UA</sub>, (J) plasma Cr, (K) BUN, and (L) CL<sub>Cr</sub> in WT (n=8), high HPRT activity *Uox*-KO (n=8) and *Urat1-Uox* DKO mice (n=9) after (post) the forced swimming test. Data were analyzed using scatter plots. The coefficient of determination and *p* value are shown in each panel.

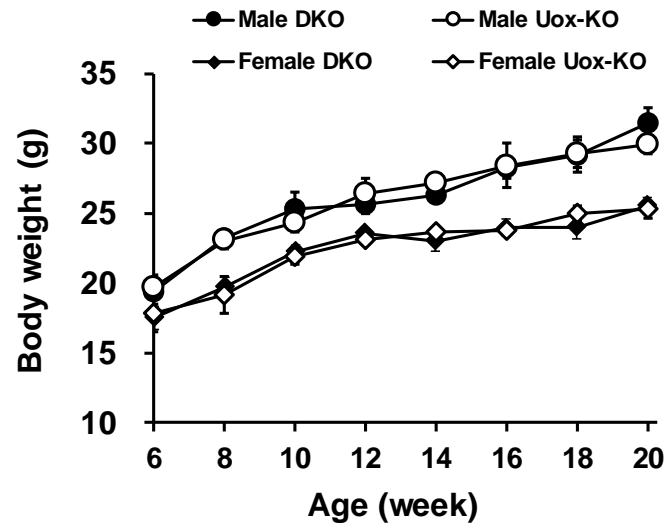

**Supplemental Figure 1**

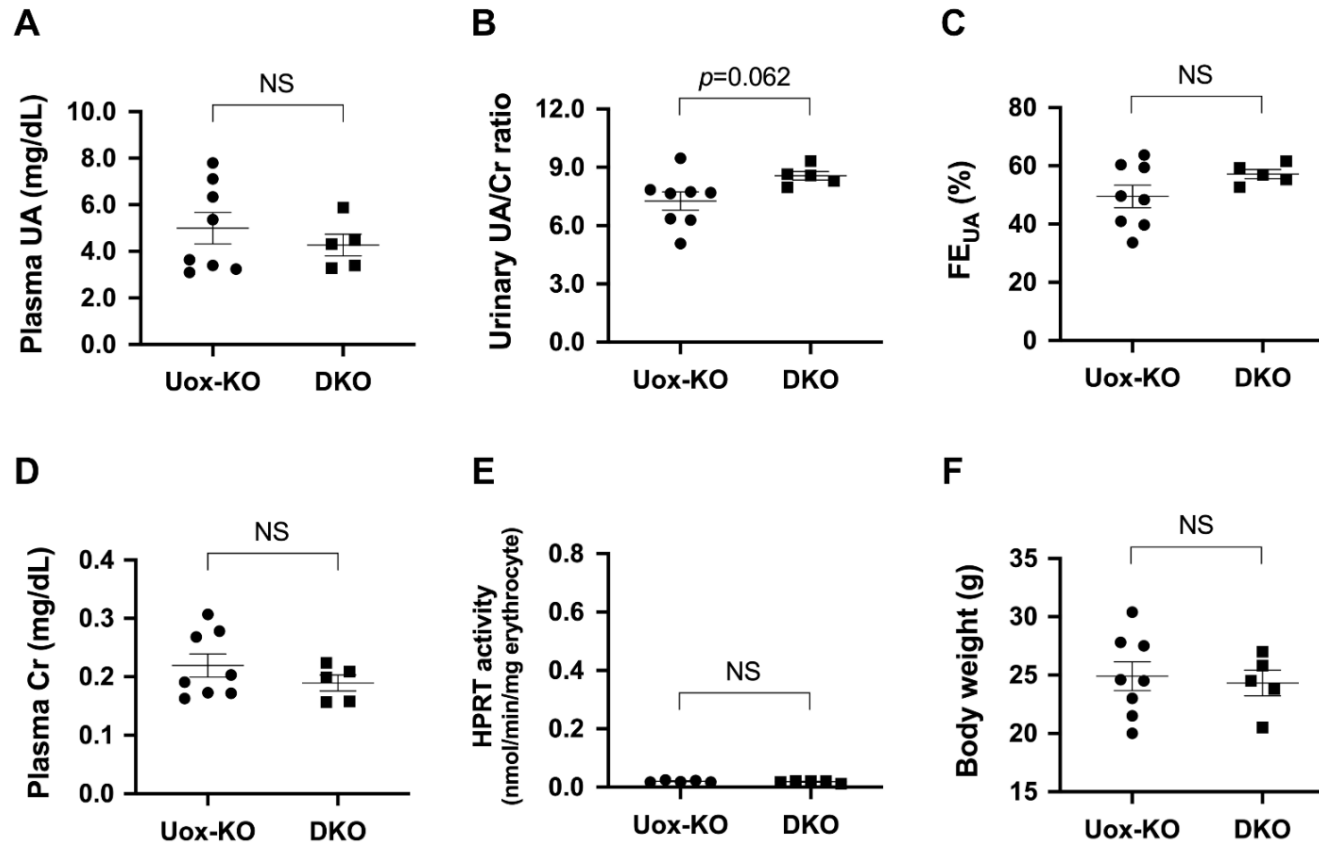

Supplemental Figure 2

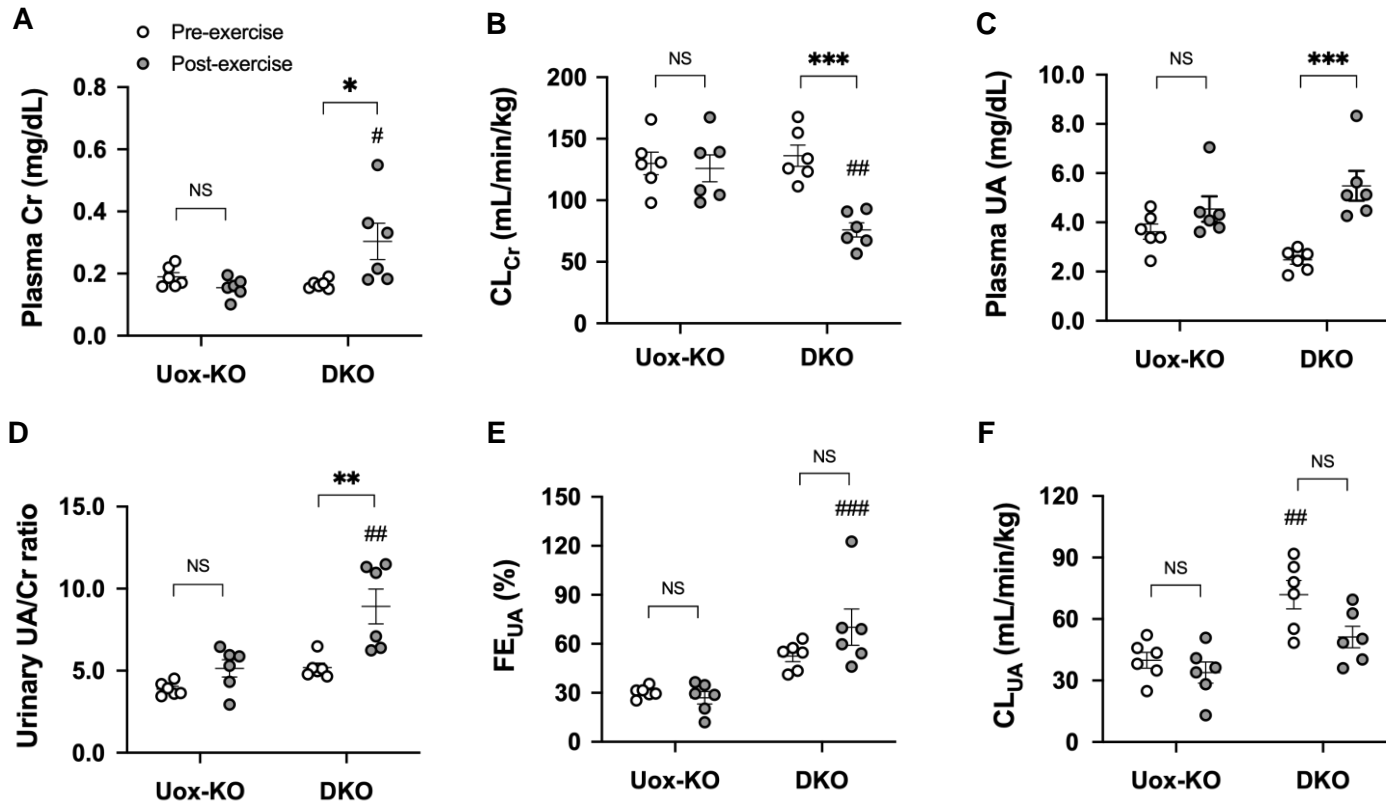

Supplemental Figure 3



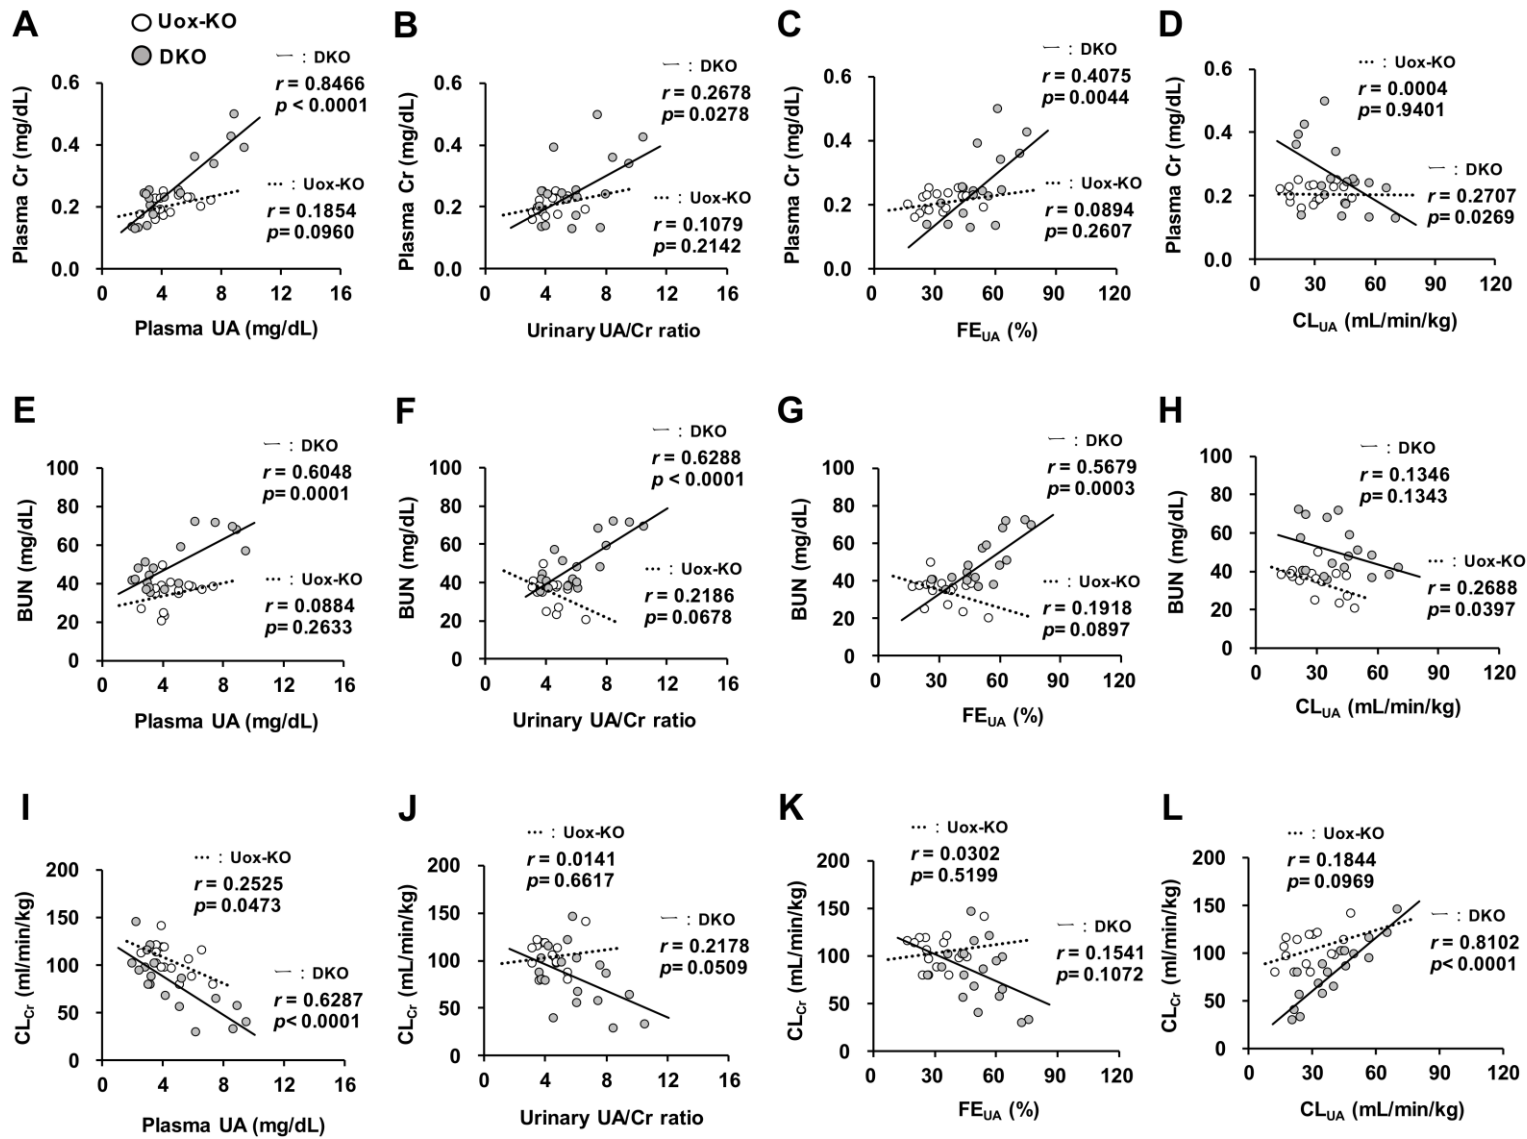

Supplemental Figure 4

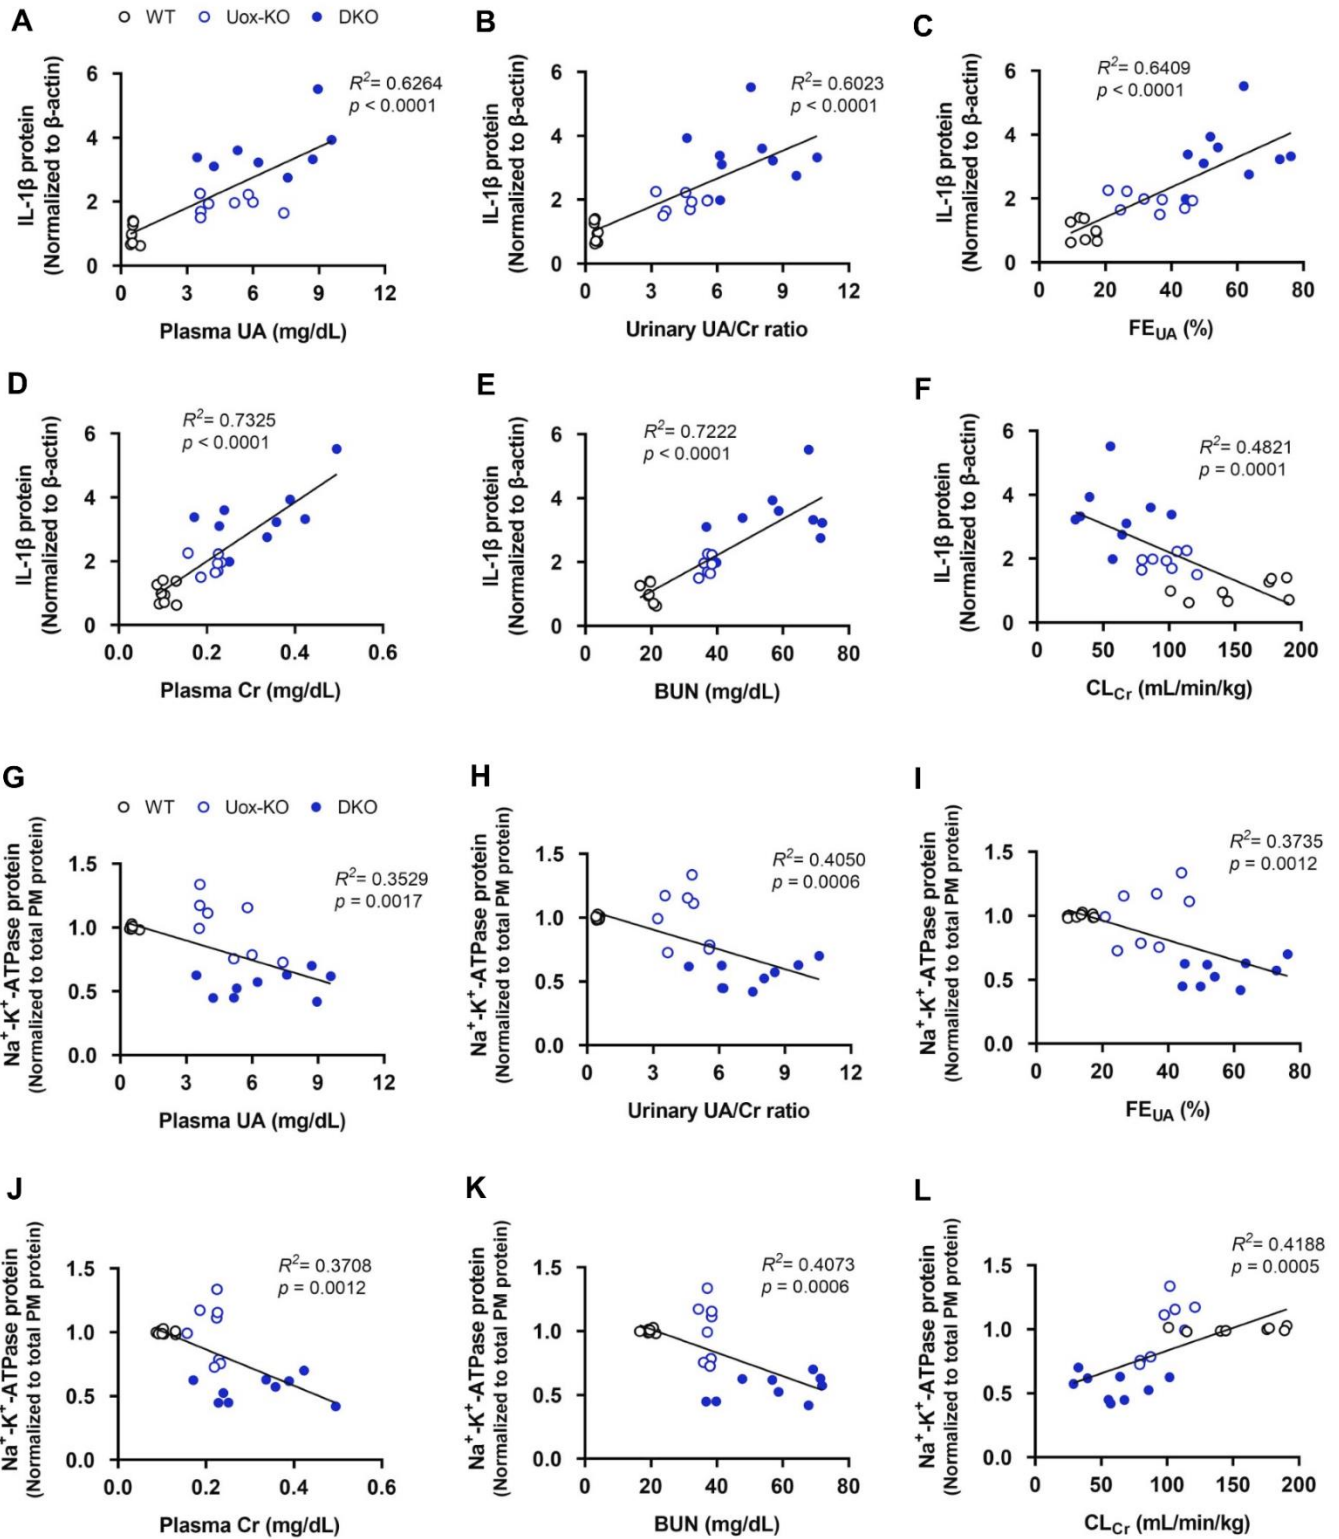

Supplemental Figure 5
